# Supplementary material for: An efficient environmentally friendly CuFe2O4/SiO2 catalyst for vanillyl mandelic acid oxidation in water under atmospheric pressure and a mechanism study
Source: Royal Society of Chemistry journal article supplement (doi:10.1039/d0nj04798h), 2020-12-08

## Supporting Information

### **An Efficient Environmentally Friendly $\text{CuFe}_2\text{O}_4/\text{SiO}_2$ Catalyst for Vanillyl Mandelic Acid Oxidation in Water at Atmospheric Pressure and Mechanism Study**

*Haifang Mao<sup>1</sup>, Hongzhao Wang<sup>1</sup>, Tao Meng<sup>1</sup>, Chaoyang Wang<sup>1</sup>, Xiaojun Hu<sup>1\*</sup>,  
Zuobing Xiao<sup>2</sup>, Jibo Liu<sup>1\*</sup>*

1. School of Chemical and Environmental Engineering, Shanghai Institute of Technology, 100 Haiquan Road, 201418, Shanghai, China.
2. School of Perfume and Aroma Technology, Shanghai Institute of Technology, 100 Haiquan Road, 201418, Shanghai, China.

**Scheme S1** Schematic diagram of Catalytic oxidation VMA by  $\text{CuFe}_2\text{O}_4/\text{SiO}_2$

**Fig.S1** The high-performance liquid chromatography (HPLC) spectrum of the reaction mixture before and after oxidation.

**Fig.S2** The fourier infrared spectrum of Purified Vanillin

**Fig.S3** The  $^1\text{H}$  NMR spectra of Purified Vanillin

**Fig.S4** The Energy Dispersive Spectrometers (EDS) of  $\text{CuFe}_2\text{O}_4/\text{SiO}_2$

**Fig.S5** The stability of vanillin at different pH for 6 hours under 100 °C

**Fig.S6** The  $\text{H}_2$ -TPR profiles of  $\text{CuFe}_2\text{O}_4/\text{SiO}_2$

**Fig.S7** The  $^1\text{H}$  NMR Spectrum of Reaction Mixture after oxidation for 6 hours

**Scheme S1** Schematic diagram of Catalytic oxidation VMA by  $\text{CuFe}_2\text{O}_4/\text{SiO}_2$

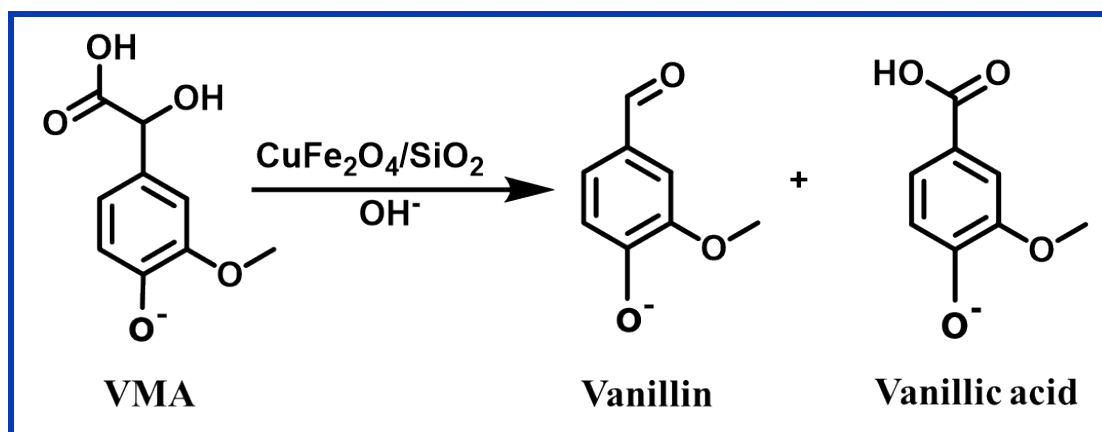

**Fig. S1** The high-performance liquid chromatography (HPLC) spectrum of the reaction

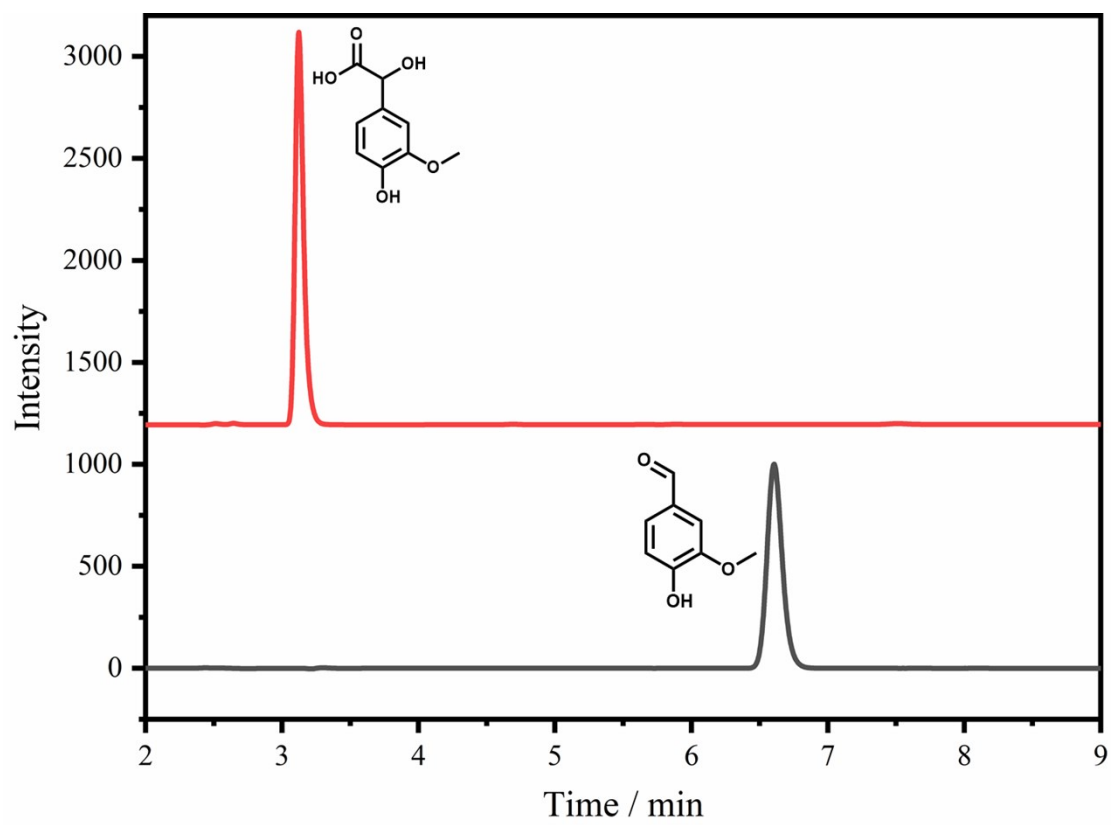

**Fig.S2** The Infrared spectra of Purified Vanillin

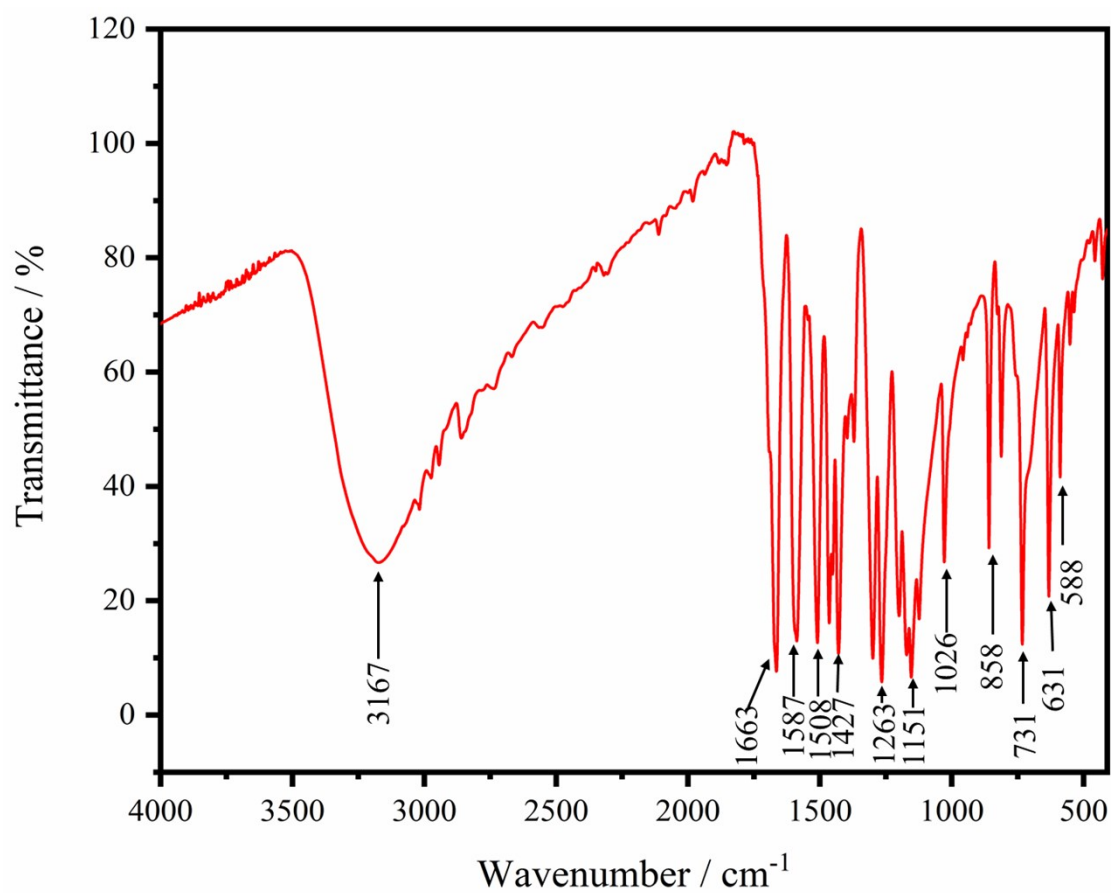

**Fig.S3** The  $^1\text{H}$  NMR spectra of Purified Vanillin

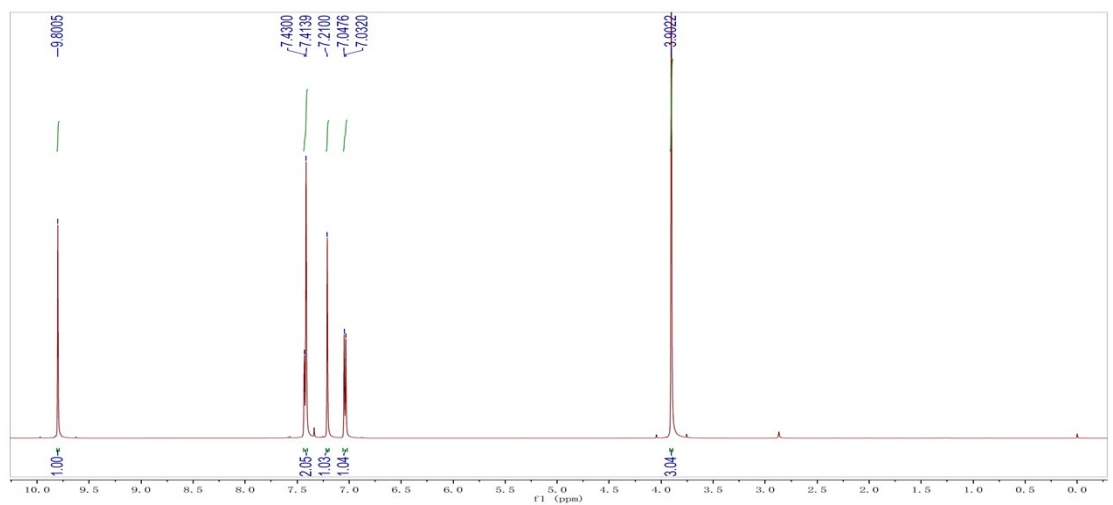

$^1\text{H}$  NMR (500 MHz,  $\text{CDCl}_3$ ):  $\delta$  = 9.80 (s, 1H), 7.42 (d,  $J$  = 8.0 Hz, 1H), 7.21 (s, 1H), 7.04 (d,  $J$  = 8.0 Hz, 1H), 3.90

(s, 3H).

**Fig.S4** The Energy Dispersive Spectrometers (EDS) of  $\text{CuFe}_2\text{O}_4/\text{SiO}_2$

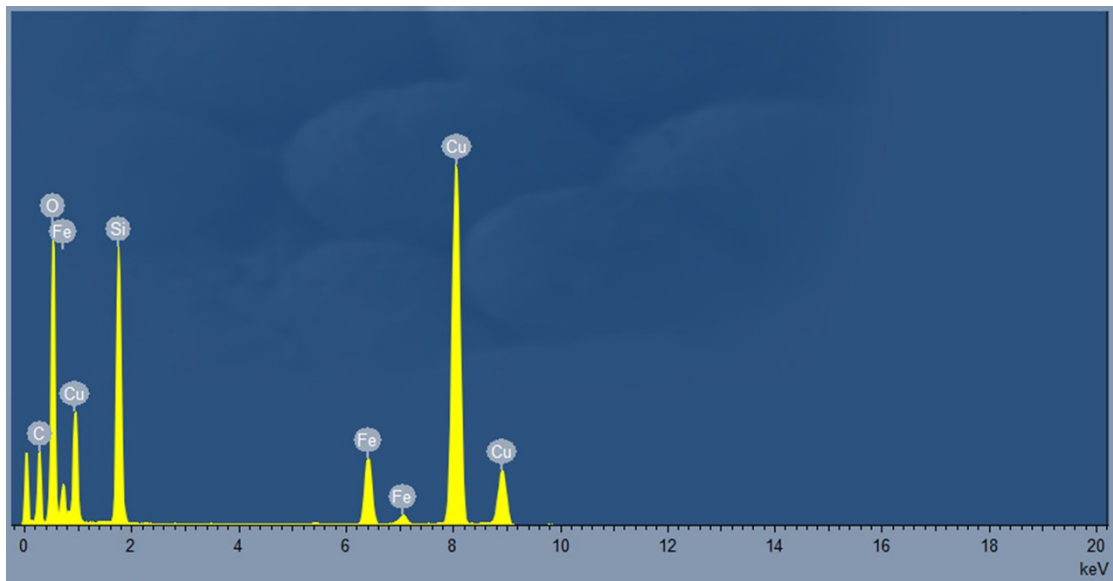

**Fig.S5** The stability of vanillin at different pH for 6 hours under 100 °C

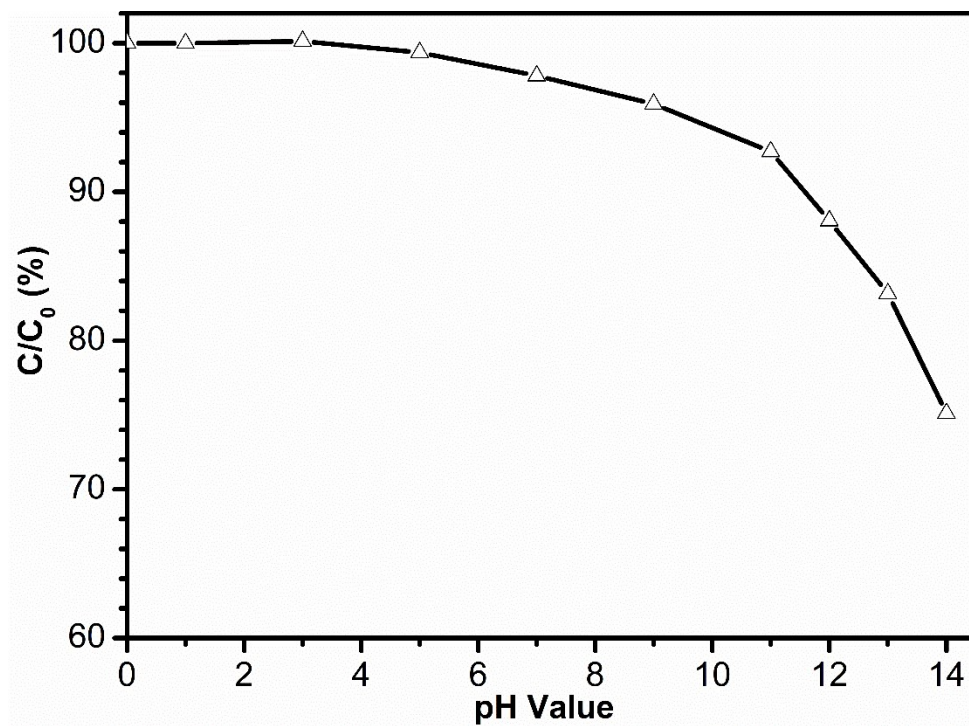



Fig.S6 The H<sub>2</sub>-TPR profiles of CuFe<sub>2</sub>O<sub>4</sub>/SiO<sub>2</sub>

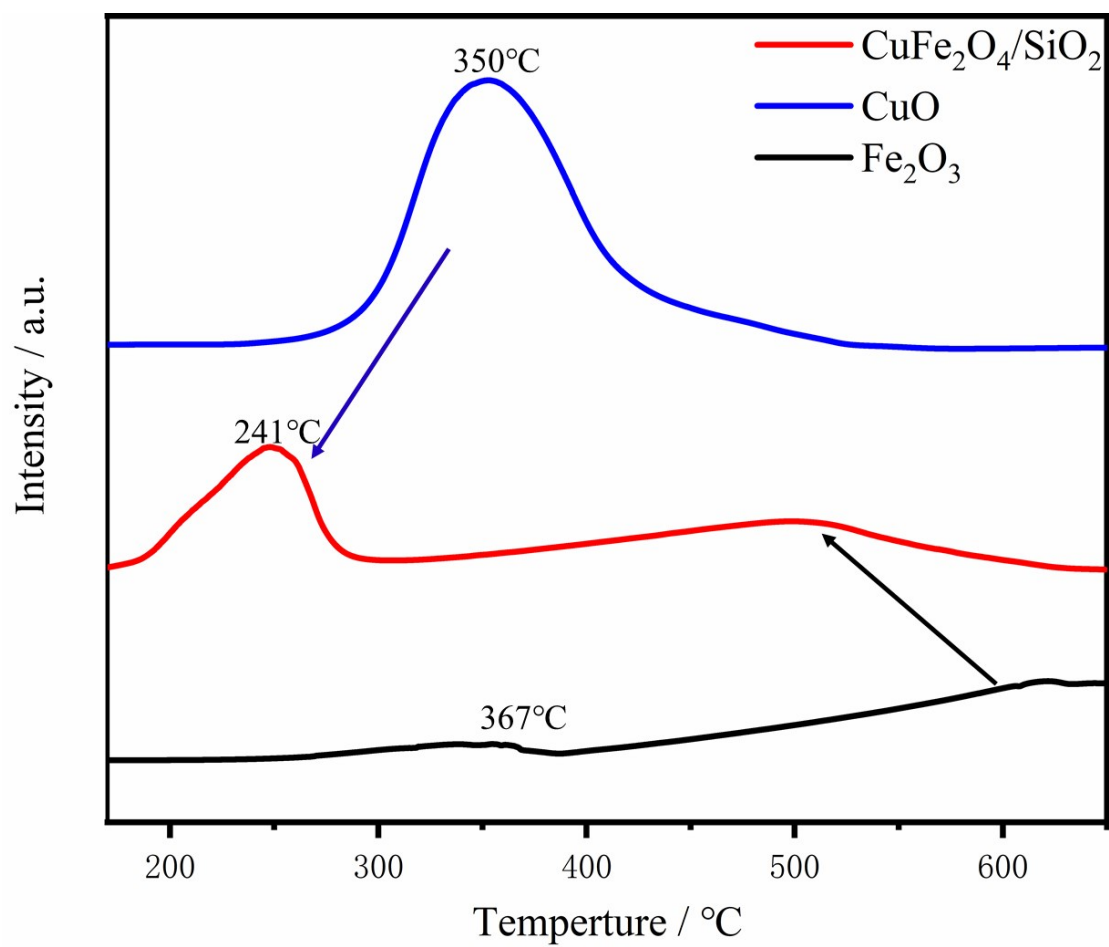

Fig.S7The <sup>1</sup>H NMR Spectrum of Reaction Mixture after oxidation for 6 hours

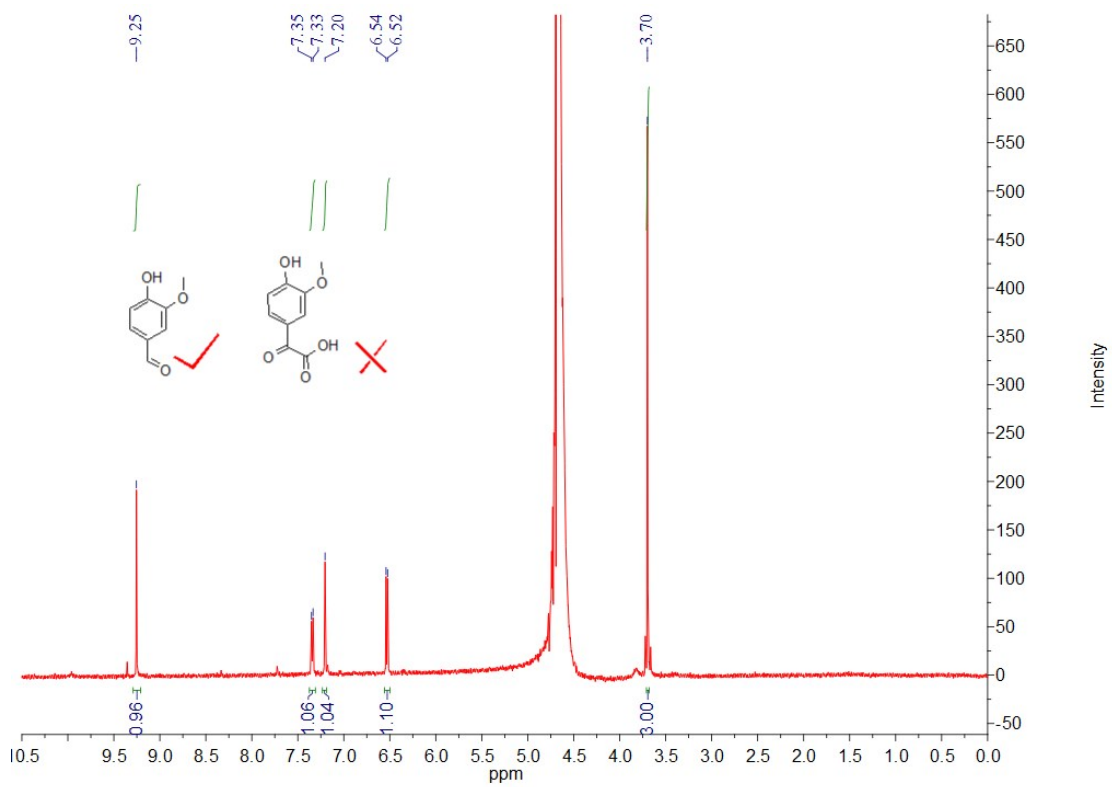

Supplement: d0nj04798h1.pdf [file d0nj04798h1.pdf]
